# Supplementary material for: Lactiplantibacillusplantarum ATG-K2 Exerts an Anti-Obesity Effect in High-Fat Diet-Induced Obese Mice by Modulating the Gut Microbiome
Source: MDPI journal article supplement (doi:10.3390/ijms222312665), 2021-11-23
Supplement: s1 [file s1]

**Supplementary Table S1. Sequences of the primers used for quantitative real-time PCR for in vitro.**

| Gene           | Primer sequence (5'→3')                                        |
|----------------|----------------------------------------------------------------|
| PPAR $\gamma$  | Forward: TTTTCAAGGGTGCCAGTTT<br>Reverse: AATCCTTGGCCCTCTGAGAT  |
| C/EBP $\alpha$ | Forward: TTACAACAGGCCAGGTTTCC<br>Reverse: GGCTGGCGACATACAGTACA |
| C/EBP $\beta$  | Forward: CCAAGAAGACGGTGGACAA<br>Reverse: CAAGTTCCGCAGGGTGCT    |
| SREBP-1c       | Forward: TGTTGGCATCCTGCTATCTG<br>Reverse: AGGGAAAGCTTTGGGGTCTA |
| ACC            | Forward: GCGTCGGGTAGATCCAGTT<br>Reverse: CTCAGTGGGGCTTAGCTCTG  |
| FAS            | Forward: TTGCTGGCACTACAGAATGC<br>Reverse: AACAGCCTCAGAGCGACAAT |
| $\beta$ -actin | Forward: CCACAGCTGAGAGGAAATC<br>Reverse: AAGGAAGGCTGGAAAAGAGC  |

**Supplementary Table S2. Sequences of the primers used for quantitative real-time PCR for in vivo.**

| <b>Genes</b>   | <b>Primer sequence (5'→3')</b>                                     |
|----------------|--------------------------------------------------------------------|
| PPAR $\gamma$  | Forward: AGTGGAGACCGCCCAGG<br>Reverse: GCAGCAGGTTGTCTTGGATGT       |
| SERBP1c        | Forward: AGCAGCCCCTAGAACAAACAC<br>Reverse: CAGCAGTGAGTCTGCCTTGAT   |
| SCD1           | Forward: TCAACTTCACCACGTTCTTCA<br>Reverse: CTCCCGTCTCCAGTTCTCTT    |
| FAS            | Forward: CTGGACTCGCTCATGGGTG<br>Reverse: CATTTCTGAAGTTTCCGCAG      |
| DGAT1          | Forward: TCAGATTGAGAAGCGCCTGG<br>Reverse: ACGGAACCCACTGGAGTGAT     |
| PPAR $\alpha$  | Forward: GTACGGTGTGTATGAAGCCATCTT<br>Reverse: GCCGTACGCGATCAGCAT   |
| ACO            | Forward: GTGCAGCTCAGAGTCTGTCCAA<br>Reverse: TACTGCTGCGTCTGAAAATCCA |
| CPT1           | Forward: TGAGTGGCGTCCTCTTTGG<br>Reverse: TCAGCGAGTAGCGCATAGTCA     |
| UCP1           | Forward: CTTTGCCTCACTCAGGATTGG<br>Reverse: ACTGCCACACCTCCAGTCATT   |
| PGC1 $\alpha$  | Forward: CCTGAAGCCGGGAGAGAATG<br>Reverse: TAGCCAGCAGAGACTGTGGA     |
| Prdm16         | Forward: GAAGTCACAGGAGGACACGG<br>Reverse: CTCGCTCCTCAACACACCTC     |
| ND5            | Forward: AGCATTCGGAAGCATCTTTG<br>Reverse: TTGTGAGGACTGGAATGCTG     |
| Dio2           | Forward: TTGGGGTAGGGAATGTTGGC<br>Reverse: TCCGTTTCCTCTTTCCGGTG     |
| $\beta$ -actin | Forward: GGCACCACACYTTCTACAATG<br>Reverse: GGGGTGTTGAAGGTCTCAAAC   |

## Supplementary Figure S1

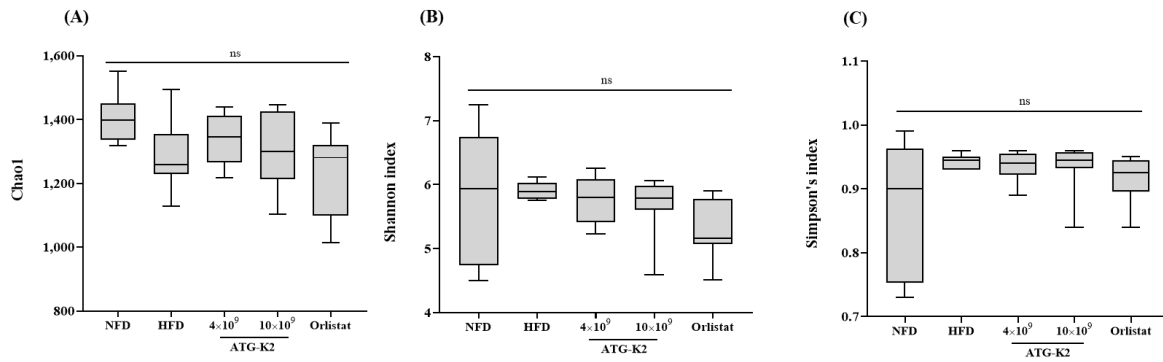

Figure S1. The richness and diversity of *L. plantarum* ATG-K2 in HFD-induced obese mice. (A) Chao 1, (B) Shannon index, and (C) Simpson's index. NFD: Normal fat diet; HFD: High-fat diet;  $4 \times 10^9$ ,  $10 \times 10^9$ : HFD +  $4 \times 10^9$  or  $10 \times 10^9$  CFU/day *L. plantarum* ATG-K2; Orlistat: HFD + Orlistat 15.6 mg/kg. The ends of the whiskers represent the minimum and maximum, the bottom and top of the box are the 1st and 3rd quartiles, and the line within the box is the median.

## Supplementary Figure S2

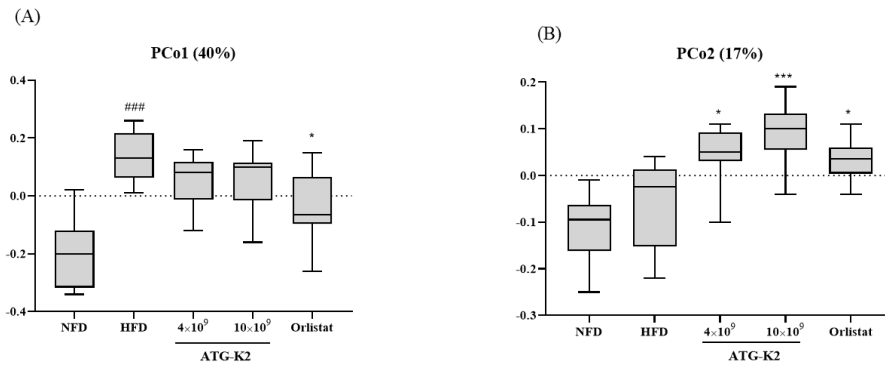

Figure S2. Principal coordinates analysis of *L. plantarum* ATG-K2 in HFD-induced obese mice using UniFrac distance matrix. (A) Examination of the PCo1, (B) Examination of the PCo2. Normal fat diet; HFD: High-fat diet;  $4 \times 10^9$ ,  $10 \times 10^9$ : HFD +  $4 \times 10^9$  or  $10 \times 10^9$  CFU/day *L. plantarum* ATG-K2; Orlistat: HFD + Orlistat 15.6 mg/kg. ###  $p < 0.005$  vs. NFD group; \*  $p < 0.05$ , \*\*  $p < 0.01$ , and \*\*\*  $p < 0.005$  vs. HFD group.
